# Supplementary material
Source: PubMed Central journal article supplement (PMC154348)

Figure 1

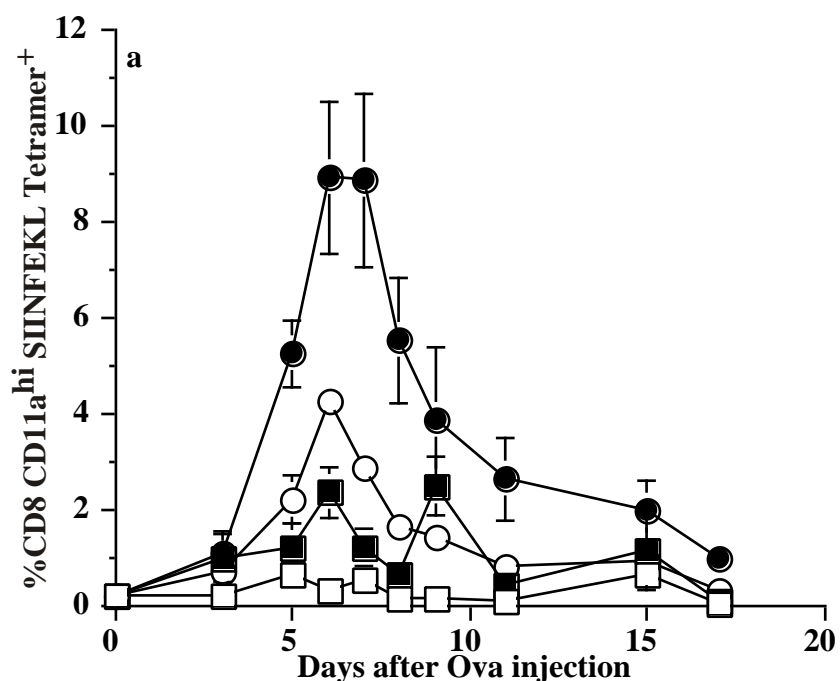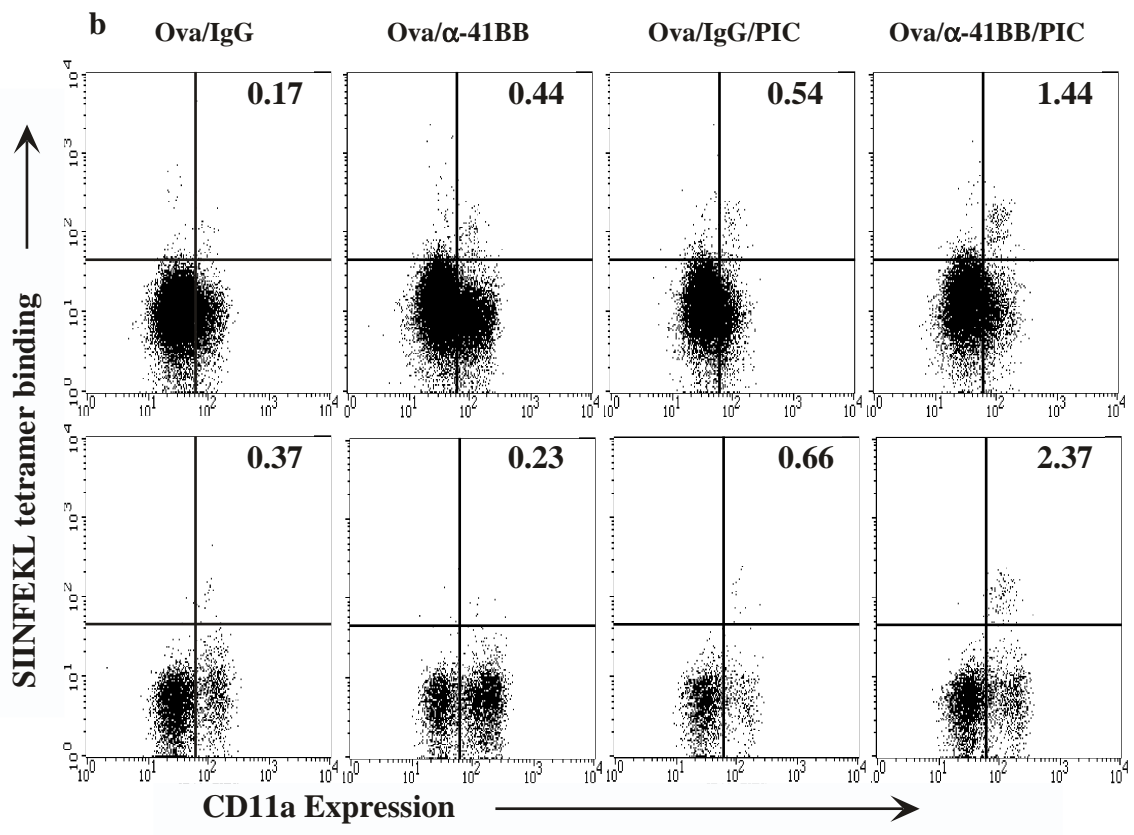

Supplement: pnas_0837611100_2.pdf [file pnas_0837611100_2.pdf]
